# Supplementary material for: Dynamic Changes of Bacterial Communities and Microbial Association Networks in Ready-to-Eat Chicken Meat during Storage
Source: MDPI journal article supplement (doi:10.3390/foods11223733), 2022-11-21
Supplement: s1 [file s1]

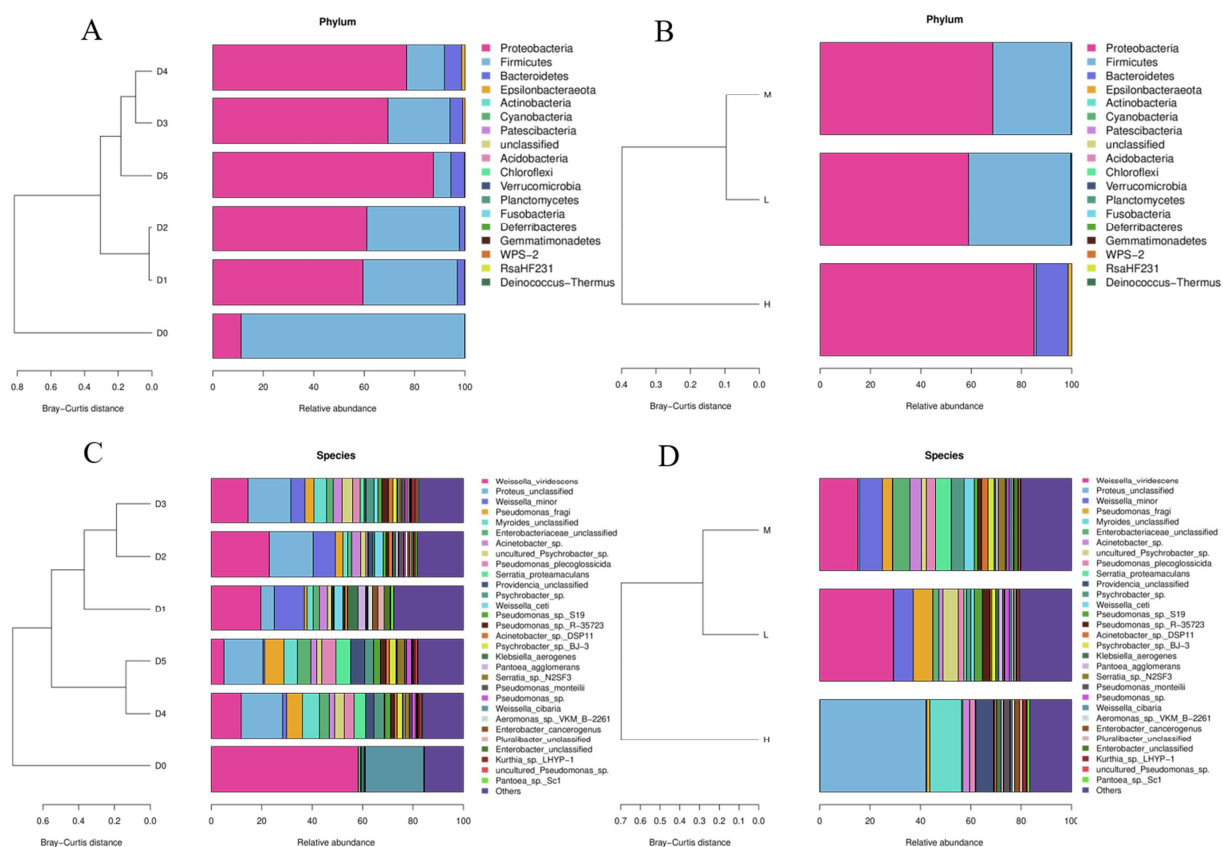

**Figure S1.** Cluster analysis in the RTE chicken meat samples based on (A, C) storage time and (B, D) temperature at the (A, B) phylum and (C, D) species level.

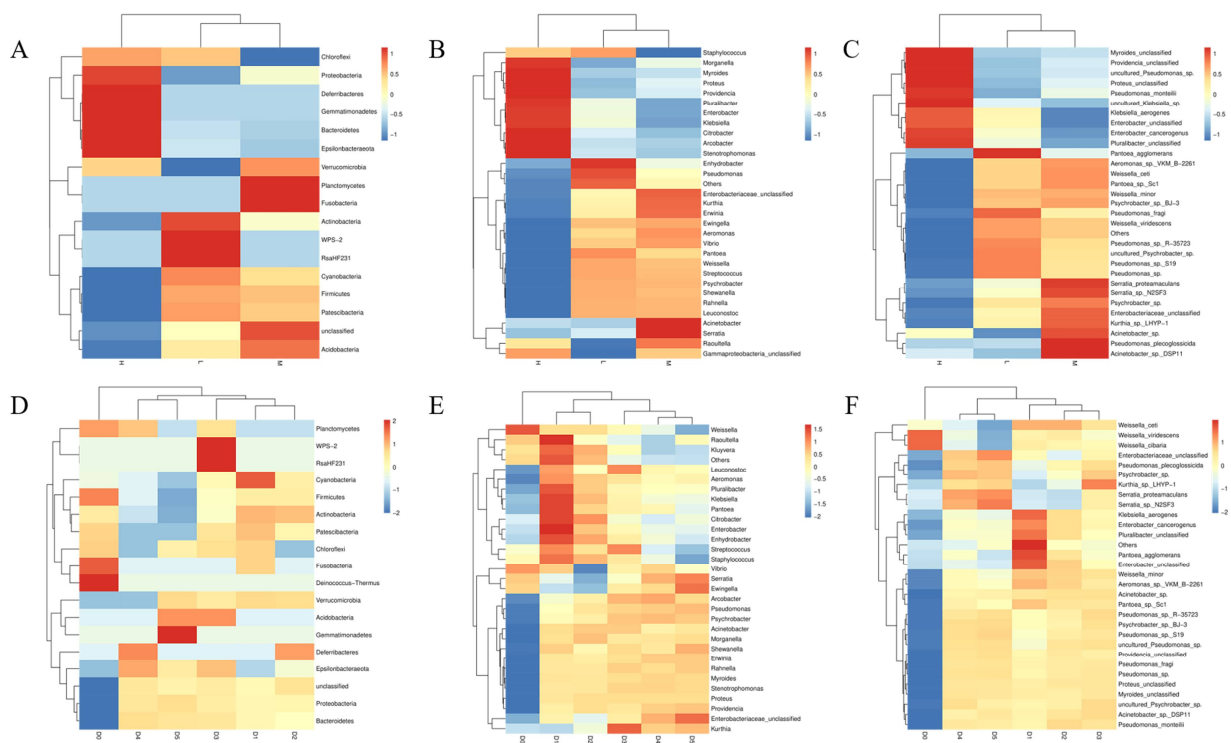

**Figure S2.** Heatmap analysis in the RTE chicken meat samples based on (A - C) storage temperature and (D - F) time at the (A, D) phylum, (B, E) genus and (C, F) species level.

**Table S1.** Species-level microbial interactions detected by SparCC in the bacterial communities of chicken meat samples stored at 4, 8 and 22 °C.

| Temperature (°C) | Interaction                                                                 | Pearson correlation† | Relation         |
|------------------|-----------------------------------------------------------------------------|----------------------|------------------|
| 4                | <i>Weissella_minor</i> ↔ <i>Weissella_viridescens</i>                       | 0.653                | Copresence       |
|                  | <i>Pseudomonas_fragi</i> ↔ <i>Pseudomonas_sp._S19</i>                       | 0.6491               | Copresence       |
|                  | <i>Pseudomonas_fragi</i> ↔ <i>Pseudomonas_sp._R-35723</i>                   | 0.5624               | Copresence       |
|                  | <i>Pseudomonas_sp._R-35723</i> ↔ <i>Pseudomonas_sp._S19</i>                 | 0.5401               | Copresence       |
|                  | <i>Pseudomonas_fragi</i> ↔ <i>Pseudomonas_sp._R-35723</i>                   | 0.5241               | Copresence       |
|                  | <i>Pseudomonas_sp._R-35723</i> ↔ <i>Pseudomonas_sp._S19</i>                 | 0.4964               | Copresence       |
|                  | <i>Pseudomonas_sp._R-35723</i> ↔ <i>Pseudomonas_sp._55D</i>                 | 0.4567               | Copresence       |
|                  | <i>Weissella_ceti</i> ↔ <i>Weissella_minor</i>                              | 0.4556               | Copresence       |
|                  | <i>Pseudomonas_sp._55D</i> ↔ <i>Pseudomonas_sp._S19</i>                     | 0.4311               | Copresence       |
|                  | <i>Psychrobacter_sp._BJ-3</i> ↔ <i>Psychrobacter_sp._BJ-3</i>               | 0.4305               | Copresence       |
|                  | <i>Pseudomonas_sp._55D</i> ↔ <i>Weissella_viridescens</i>                   | 0.4186               | Copresence       |
|                  | <i>Pseudomonas_sp._R-35723</i> ↔ <i>Weissella_minor</i>                     | -0.4597              | Mutual exclusion |
|                  | <i>Pseudomonas_sp._R-35723</i> ↔ <i>Weissella_viridescens</i>               | -0.4649              | Mutual exclusion |
|                  | <i>Pseudomonas_sp._R-35723</i> ↔ <i>Weissella_viridescens</i>               | -0.4682              | Mutual exclusion |
|                  | <i>Pseudomonas_sp._R-35723</i> ↔ <i>Weissella_viridescens</i>               | -0.482               | Mutual exclusion |
|                  | <i>Pseudomonas_sp._S19</i> ↔ <i>Weissella_minor</i>                         | -0.5245              | Mutual exclusion |
|                  | <i>Pseudomonas_sp._S19</i> ↔ <i>Weissella_viridescens</i>                   | -0.5452              | Mutual exclusion |
|                  | <i>Pseudomonas_fragi</i> ↔ <i>Weissella_viridescens</i>                     | -0.5982              | Mutual exclusion |
|                  | <i>Pseudomonas_fragi</i> ↔ <i>Weissella_minor</i>                           | -0.6072              | Mutual exclusion |
|                  | <i>Weissella_minor</i> ↔ <i>Weissella_viridescens</i>                       | -0.6223              | Mutual exclusion |
|                  | <i>Serratia_proteamaculans</i> ↔ <i>Serratia_sp._N2SF3</i>                  | 0.7217               | Copresence       |
|                  | <i>Weissella_ceti</i> ↔ <i>Weissella_viridescens</i>                        | 0.6608               | Copresence       |
|                  | <i>Enterobacteriaceae_unclassified</i> ↔ <i>Serratia_proteamaculans</i>     | 0.6434               | Copresence       |
|                  | <i>Pseudomonas_plecoglossicida</i> ↔ <i>Serratia_proteamaculans</i>         | 0.6273               | Copresence       |
|                  | <i>Psychrobacter_sp._BJ-3</i> ↔ <i>Psychrobacter_sp._BJ-3</i>               | 0.6183               | Copresence       |
| 8                | <i>Weissella_ceti</i> ↔ <i>Weissella_viridescens</i>                        | 0.6125               | Copresence       |
|                  | <i>Acinetobacter_sp._DSP11</i> ↔ <i>Acinetobacter_sp._DSP11</i>             | 0.586                | Copresence       |
|                  | <i>Enterobacteriaceae_unclassified</i> ↔ <i>Serratia_sp._N2SF3</i>          | 0.5672               | Copresence       |
|                  | <i>Pseudomonas_fragi</i> ↔ <i>Pseudomonas_sp._S19</i>                       | 0.567                | Copresence       |
|                  | <i>Pseudomonas_plecoglossicida</i> ↔ <i>Serratia_sp._N2SF3</i>              | 0.5039               | Copresence       |
|                  | <i>Enterobacteriaceae_unclassified</i> ↔ <i>Pseudomonas_plecoglossicida</i> | 0.4947               | Copresence       |
|                  | <i>Pseudomonas_fragi</i> ↔ <i>Pseudomonas_sp._R-35723</i>                   | 0.4714               | Copresence       |
|                  | <i>Pseudomonas_fragi</i> ↔ <i>Pseudomonas_sp._R-35723</i>                   | 0.454                | Copresence       |
|                  | <i>Pseudomonas_fragi</i> ↔ <i>Psychrobacter_sp._BJ-3</i>                    | 0.4321               | Copresence       |
|                  | <i>Acinetobacter_sp._R-35723</i> ↔ <i>Pseudomonas_plecoglossicida</i>       | 0.42                 | Copresence       |
|                  | <i>Pseudomonas_sp._R-35723</i> ↔ <i>Pseudomonas_sp._S19</i>                 | 0.4048               | Copresence       |
|                  | <i>Serratia_sp._N2SF3</i> ↔ <i>Weissella_ceti</i>                           | 0.4035               | Copresence       |
|                  | <i>Pseudomonas_fragi</i> ↔ <i>Weissella_viridescens</i>                     | -0.4009              | Mutual exclusion |
|                  | <i>Enterobacteriaceae_unclassified</i> ↔ <i>Weissella_minor</i>             | -0.4098              | Mutual exclusion |
|                  | <i>Serratia_proteamaculans</i> ↔ <i>Weissella_ceti</i>                      | -0.4246              | Mutual exclusion |
|                  | <i>Serratia_sp._N2SF3</i> ↔ <i>Weissella_minor</i>                          | -0.425               | Mutual exclusion |
|                  | <i>Enterobacteriaceae_unclassified</i> ↔ <i>Weissella_viridescens</i>       | -0.438               | Mutual exclusion |
|                  | <i>Serratia_proteamaculans</i> ↔ <i>Weissella_viridescens</i>               | -0.4794              | Mutual exclusion |
|                  | <i>Serratia_sp._N2SF3</i> ↔ <i>Weissella_viridescens</i>                    | -0.4807              | Mutual exclusion |
|                  | <i>Serratia_sp._N2SF3</i> ↔ <i>Weissella_viridescens</i>                    | -0.5003              | Mutual exclusion |
|                  | <i>Serratia_proteamaculans</i> ↔ <i>Weissella_viridescens</i>               | -0.5295              | Mutual exclusion |
|                  | <i>Proteus_unclassified</i> ↔ <i>Providencia_unclassified</i>               | 0.4832               | Copresence       |
|                  | <i>Klebsiella_aerogenes</i> ↔ <i>Pluralibacter_unclassified</i>             | 0.4312               | Copresence       |
|                  | <i>Enterobacter_unclassified</i> ↔ <i>Klebsiella_aerogenes</i>              | 0.4211               | Copresence       |
|                  | <i>Klebsiella_aerogenes</i> ↔ <i>Pantoea_agglomerans</i>                    | 0.4129               | Copresence       |
| 22               | <i>Proteus_unclassified</i> ↔ <i>Pseudomonas_plecoglossicida</i>            | 0.4059               | Copresence       |
|                  | <i>Klebsiella_aerogenes</i> ↔ <i>Providencia_unclassified</i>               | -0.4377              | Mutual exclusion |
|                  | <i>Enterobacter_unclassified</i> ↔ <i>Proteus_unclassified</i>              | -0.4402              | Mutual exclusion |
|                  | <i>Acinetobacter_sp._R-35723</i> ↔ <i>Providencia_unclassified</i>          | -0.4439              | Mutual exclusion |
|                  | <i>Pantoea_agglomerans</i> ↔ <i>Proteus_unclassified</i>                    | -0.4812              | Mutual exclusion |
|                  | <i>Pluralibacter_unclassified</i> ↔ <i>Proteus_unclassified</i>             | -0.4866              | Mutual exclusion |
|                  | <i>Klebsiella_aerogenes</i> ↔ <i>Proteus_unclassified</i>                   | -0.5782              | Mutual exclusion |

†The threshold values of Pearson correlation in the three constructed networks were >0.4 or <-0.4.
